# Supplementary material for: CaMKII induces permeability transition through Drp1 phosphorylation during chronic β-AR stimulation
Source: PubMed Central journal article supplement (PMC5067512; doi:10.1038/ncomms13189), 2016-10-14
Supplement: ncomms13189-s1.pdf [file ncomms13189-s1.pdf]

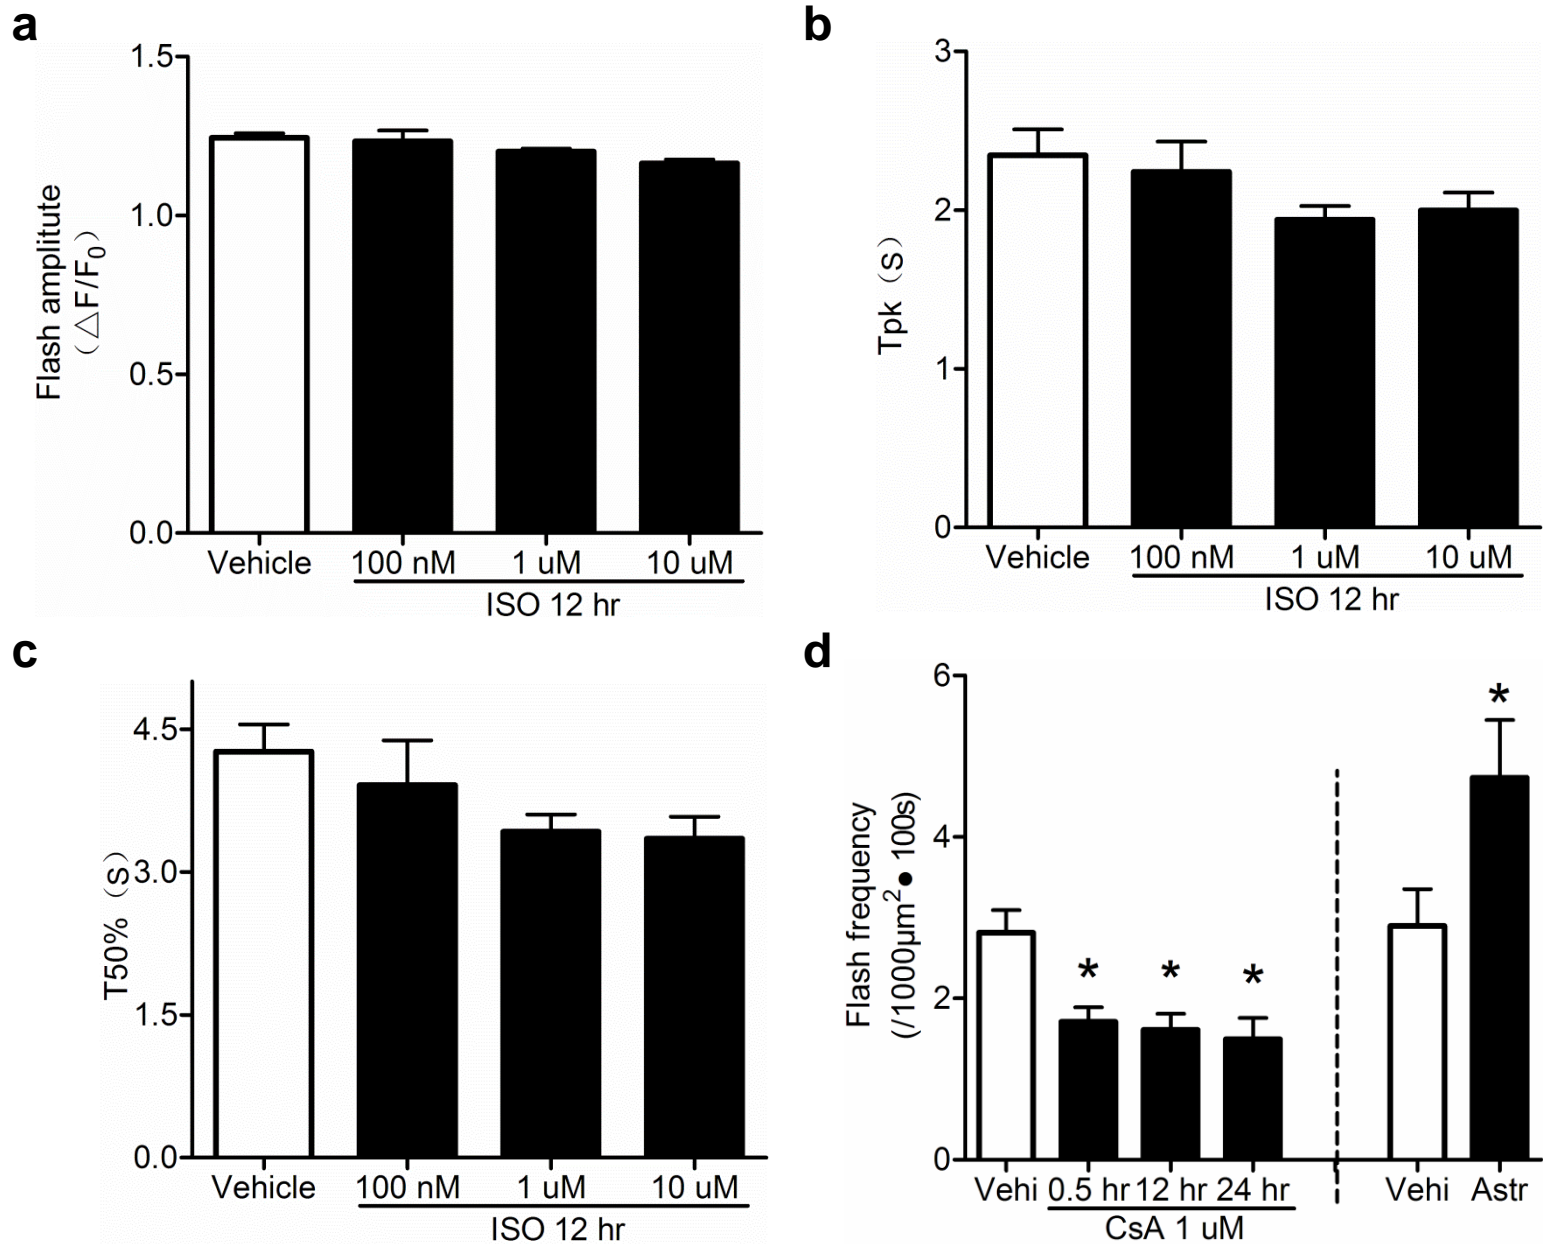

Figure S1

**Supplementary Figure 1. (a–c)** Summarized data showing the properties of ISO (12 hr)-induced flashes, including amplitude ( $\Delta F/F_0$ , a), time to peak (Tpk, b) and time from peak to 50% decay (T50%, c), N = 165, 324, 141 and 84 flashes from 12-43 myocytes in the Vehicle, 100 nM, 1  $\mu$ M and 10  $\mu$ M ISO groups, respectively. **(d)** Opposing effects of mPTP inhibition by CsA (1  $\mu$ M for 0.5 hr, 12 hr, 24 hr, N = 25, 22, 11, and 13 cells respectively) or activation by atracyloside (20  $\mu$ M, 0.5 hr, N = 11 cells) on superoxide flash frequency. Data in **(a–d)** are mean  $\pm$  s.e.m. \*P<0.05 versus Vehicle group. The data were analyzed using One-way ANOVA followed by Turkey post-test in **(a–c)** and CsA part of **(d)**, and Student's t-test in Astr part of **(d)**.

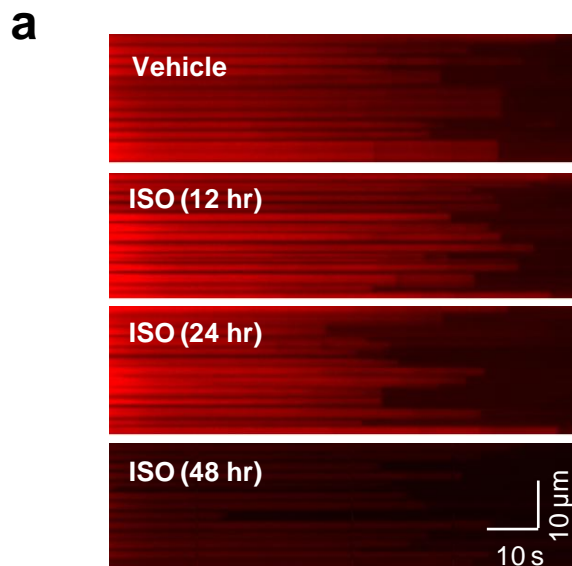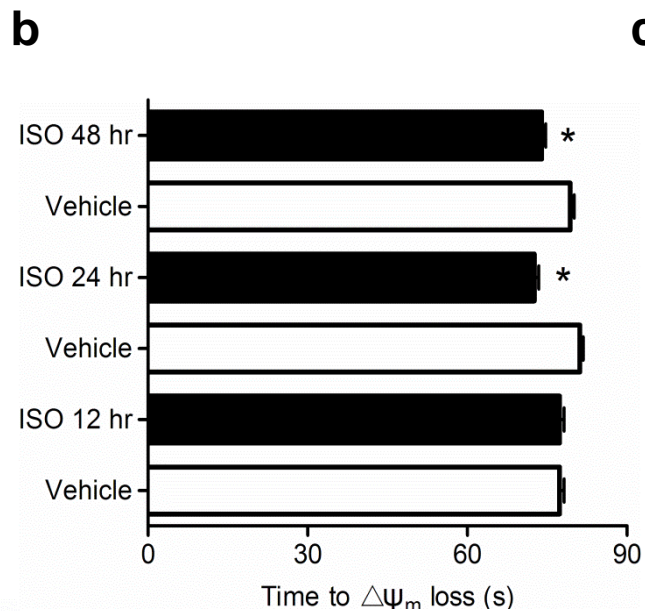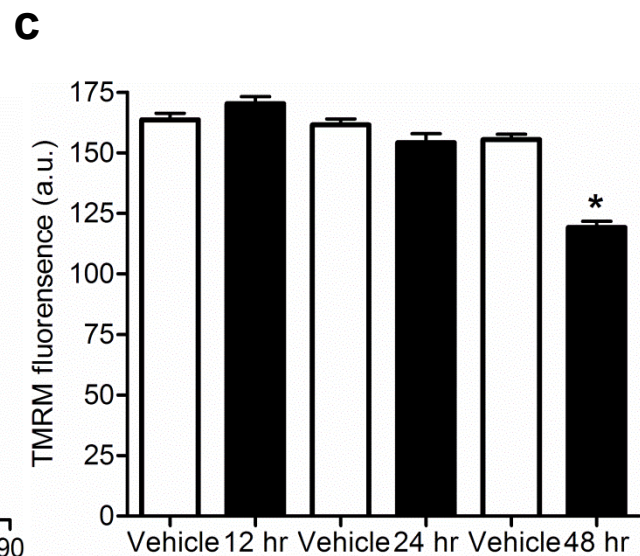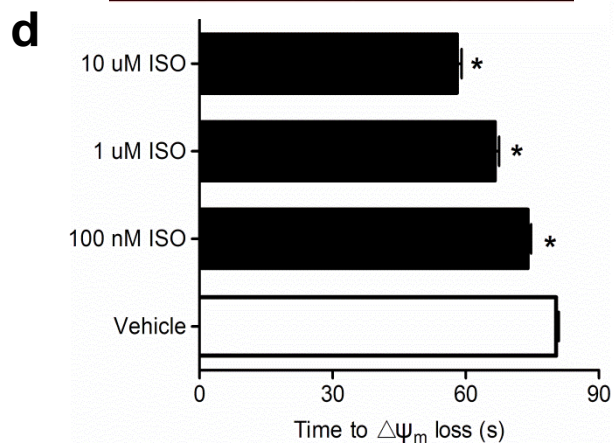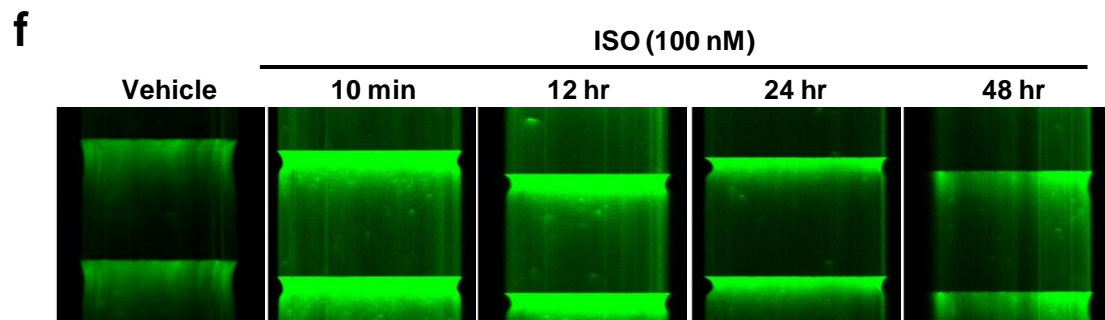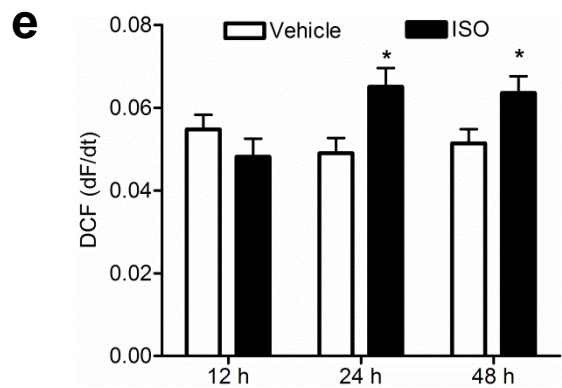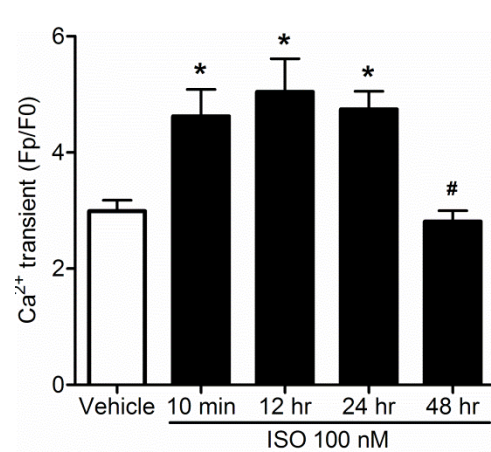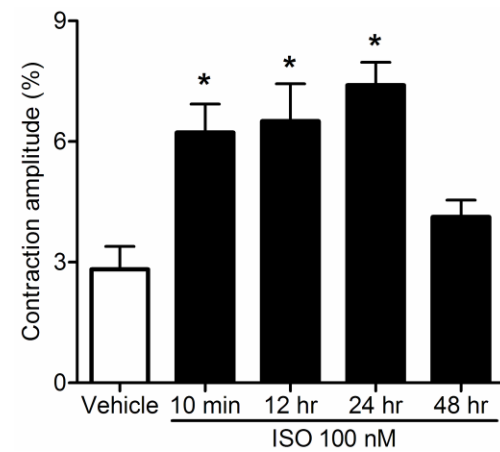

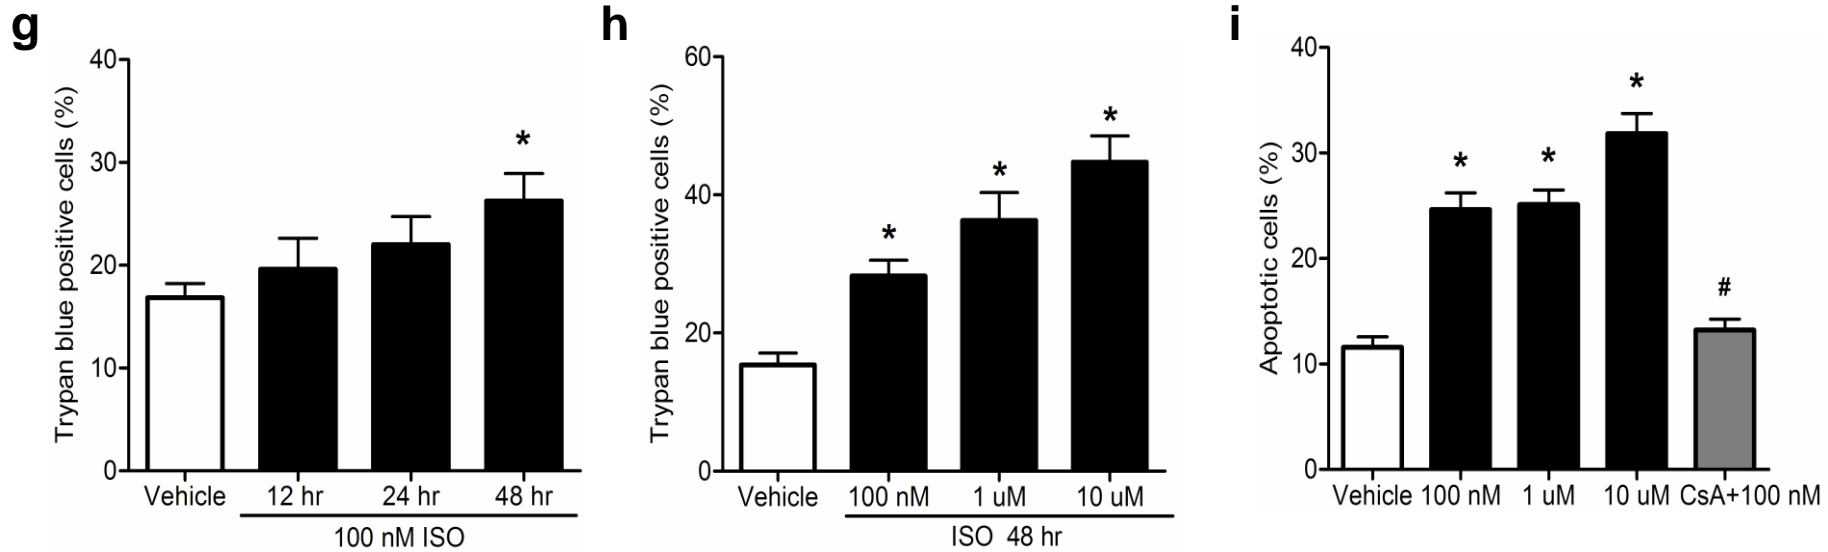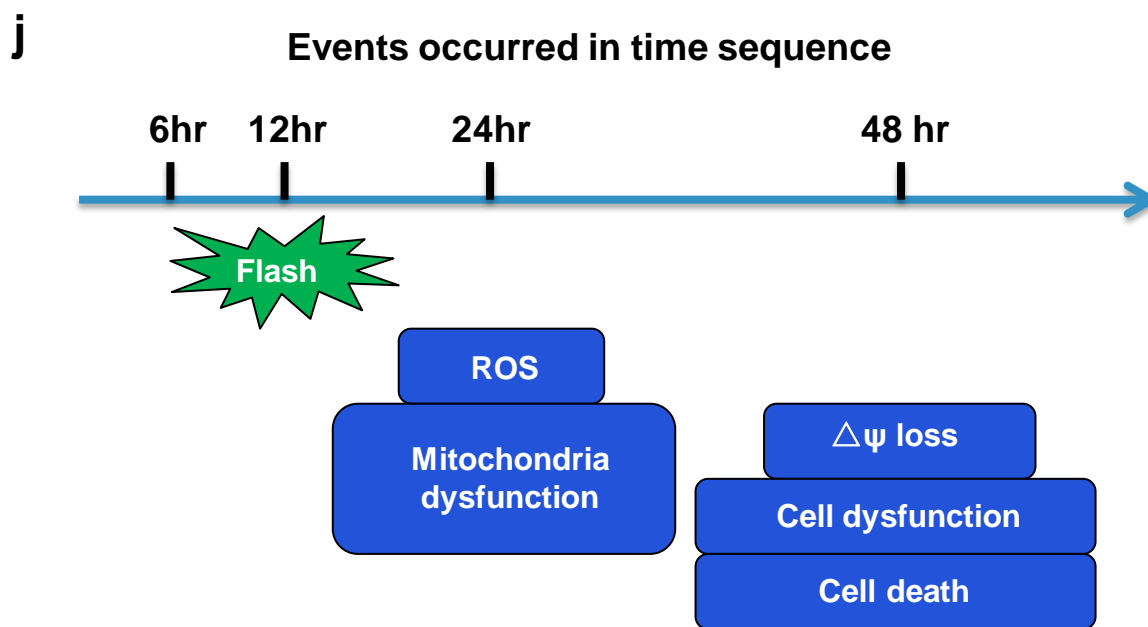

**Figure S2**

**Supplementary Figure 2.** Chronic  $\beta$ -AR stimulation led to mitochondrial and myocyte dysfunction in adult cardiomyocytes. **(a)** Representative linescan confocal images showing the laser-induced loss of  $\Delta\psi_m$  by ISO (100 nM for 12-48 hr). **(b)** Quantification of the time from the start of scan to the sudden loss of  $\Delta\psi_m$  in adult cardiomyocytes treated with ISO (100 nM for 12-48 hr). In Vehicle group, N = 290, 488, and 389 mitochondria from 23-39 cells in the time points of 12, 24, and 48 hr, respectively. In ISO group, N = 300, 388, and 463 mitochondria from 23-39 cells in the time points of 12, 24, and 48 hr, respectively. \*P<0.05 versus Vehicle group. **(c)** The time course analysis of ISO on basal  $\Delta\psi_m$  in individual mitochondrion. \*P<0.05 versus Vehicle group. **(d)** ISO promoted the laser-induced loss of  $\Delta\psi_m$  in a dose-dependent manner. N = 597, 463, 344, and 229 mitochondria in the groups of ISO 100 nM, 1 $\mu$ M, and 10  $\mu$ M, respectively. \*P<0.05 versus Vehicle group. **(e)** Time-course analysis for the effects of ISO (100 nM) treatment on cellular oxidative stress. \*P<0.05 versus Vehicle group. N = 40, 23, 46, and 46 cells from 3 rats in the groups of Vehicle, 12 hr, 24 hr and 48 hr ISO, respectively.

(f) Prolonged ISO treatment reduced  $\text{Ca}^{2+}$  transients and myocyte contraction. Upper panel: Linescan confocal images of  $\text{Ca}^{2+}$  transients in cells subjected to ISO (100 nM) with local electrical stimulation (40 V, 1 Hz). N = 35, 23, 23, 31, and 49 cells in the groups of Vehicle, 10 min, 12 hr, 24 hr and 48 hr ISO, respectively. \* $P < 0.05$  versus Vehicle group, # $P < 0.05$  versus ISO (10 min) group. (g, h) Trypan blue analysis showing time- and dose-dependent effects of ISO on myocyte death. In (g), N = 2038, 985, 1216, and 1079 myocytes in the groups of Vehicle, 12 hr, 24 hr and 48 hr ISO, respectively. In (h), N = 903, 585, 643, and 577 myocytes in the groups of Vehicle, 100 nM, 1  $\mu\text{M}$  and 10  $\mu\text{M}$ , respectively. (i) Effects of ISO on myocyte apoptosis by measuring caspase-3/7 activity (CellEvent Caspase-3/7 Green Detection Reagent). CsA administration protected against ISO-induced apoptosis. N = 926, 957, 978, 955, and 937 myocytes from 4 rats in the groups of Vehicle, 100 nM, 1  $\mu\text{M}$ , 10  $\mu\text{M}$  ISO and CsA+100 nM, respectively. Data in (b-i) are mean  $\pm$  s.e.m. (j) Diagram showing the sequential events of mitochondrial and myocyte dysfunction observed during chronic  $\beta$ -AR stimulation. The data were analyzed using by Student's t-test in (b, c, and e) and One-way ANOVA followed by Turkey post-test in (d, and f-i).

**a**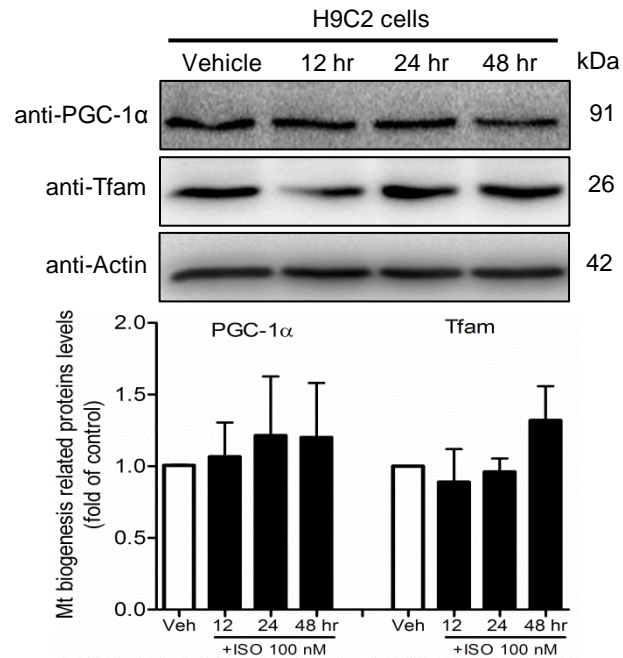**b**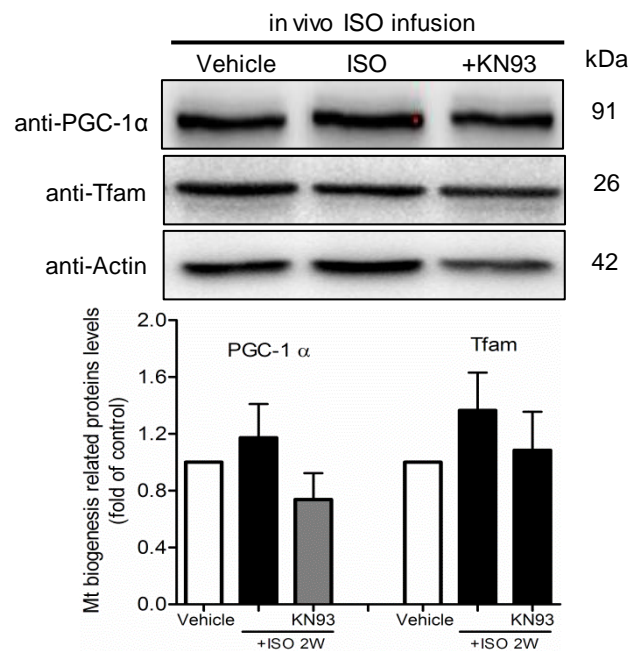**c**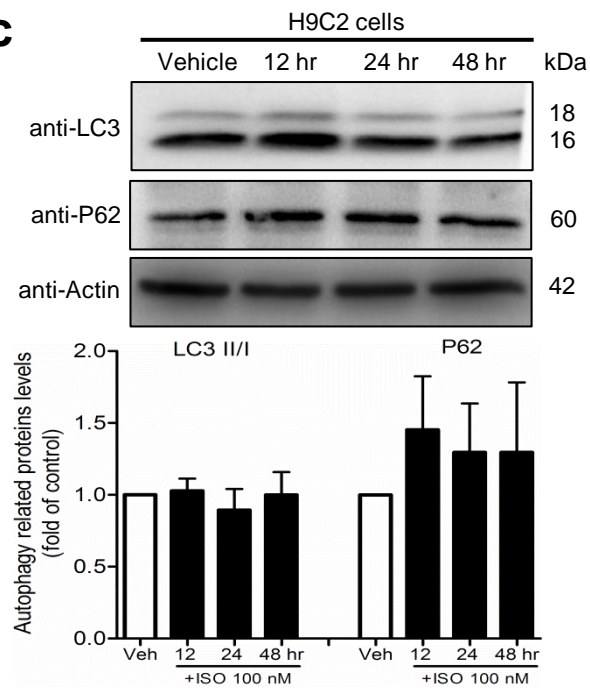**d**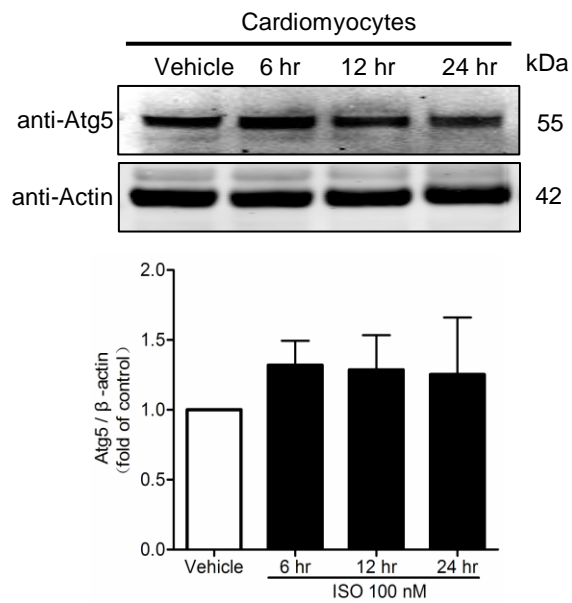**e**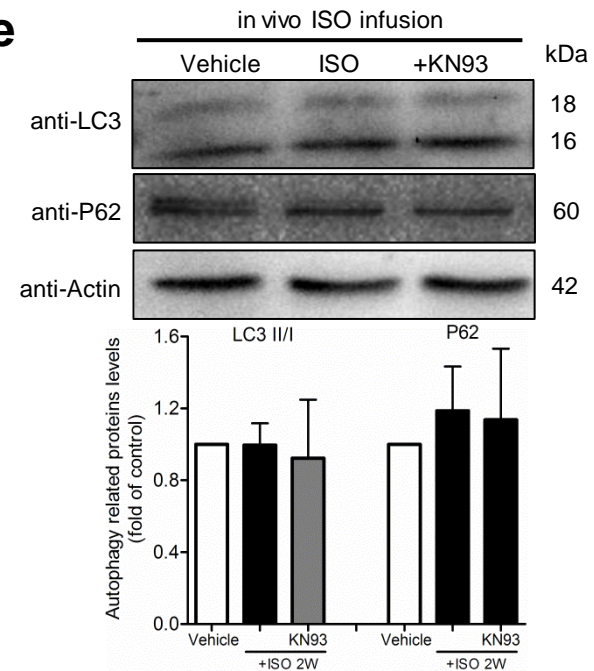**Figure S3**

**Supplementary Figure 3.** Chronic ISO stimulation had no effect on mitochondrial biogenesis and autophagy. **(a-b)** Western blot determination of the protein levels of PGC-1 $\alpha$  and Tfam, the key players in mitochondrial biogenesis, in H9C2 cell treated with ISO (**a**, 100 nM for 12-48 hr, N = 4) and mouse heart after ISO infusion (**b**, 15 mg/kg/day for 2 weeks, N = 5). **(c-e)** ISO stimulation had no effect on mitochondrial autophagy in H9C2 cells (**c**, 100 nM for 12-48 hr, N = 4), adult cardiomyocytes (**d**, 100 nM for 6-24 hr, N = 6) and mouse heart after ISO infusion (**e**, 15 mg/kg/day for 2 weeks, N = 5). Data are mean  $\pm$  s.e.m. The data were analyzed by using One-way ANOVA followed by Turkey post-test in **(a-e)**, no significant differences.



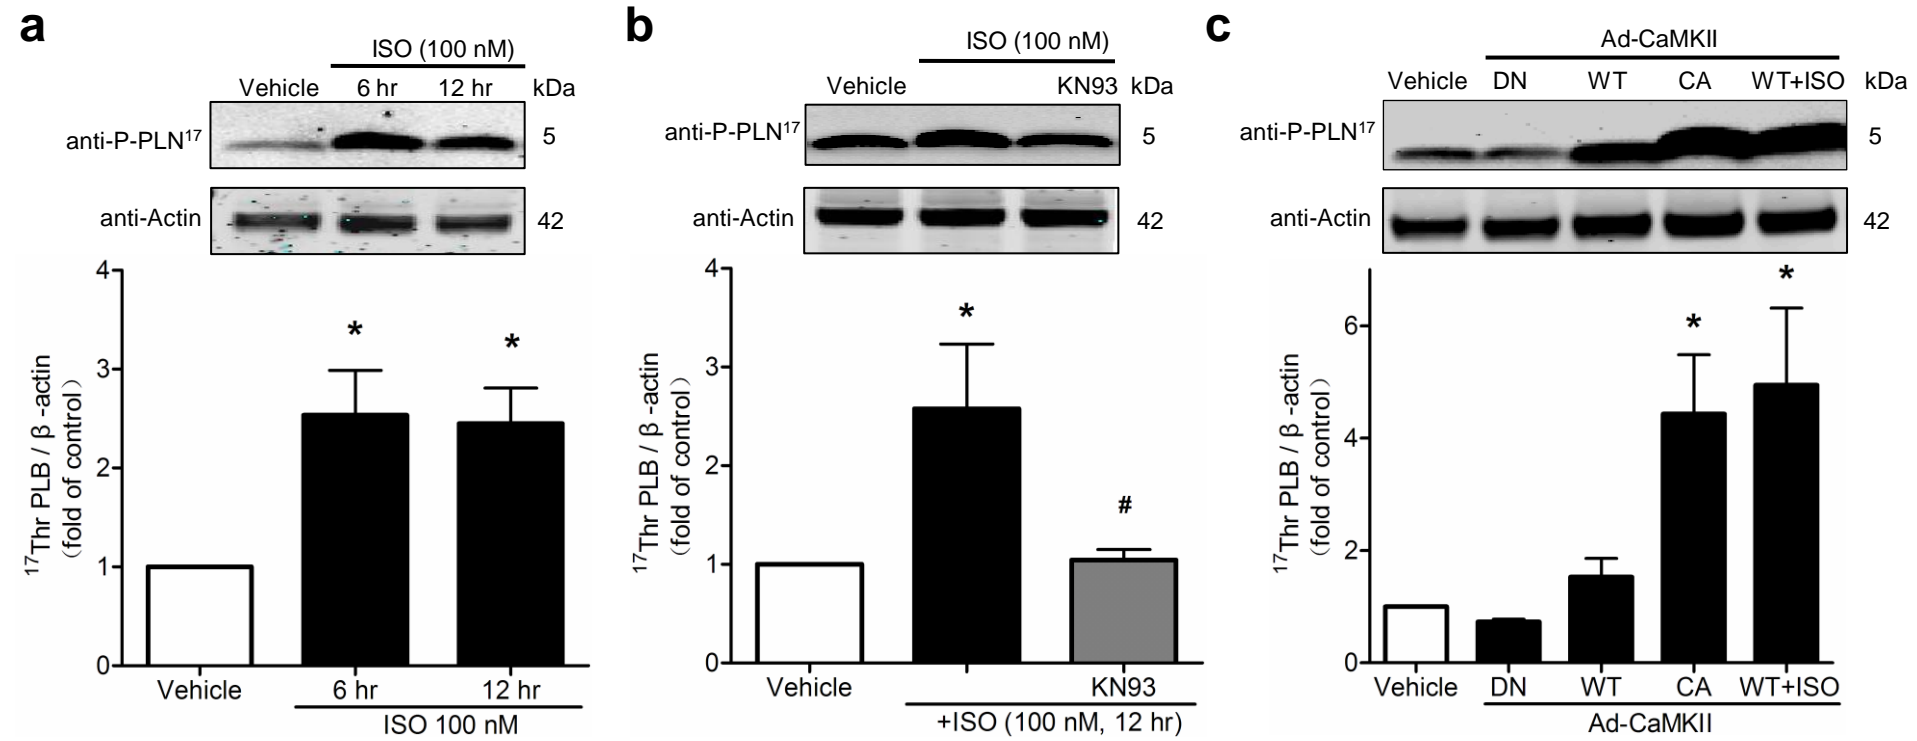

**Figure S4**

**Supplementary Figure 4.** Verification of the manipulation of CaMKII pathway by ISO or overexpression of CaMKII related mutations. **(a)** Western blot detected the phosphorylation of phospholamban (PLB) at Thr17, a known downstream site of CaMKII, in adult cardiomyocytes by ISO (100 nM for 6 hr and 12 hr). N = 3. **(b)** CaMKII blocker, KN93 prevented ISO-induced phosphorylation of PLB at Thr17 in adult cardiomyocytes. N = 3. **(c)** Adenovirus mediated overexpression of CaMKII constructs (DN, WT or CA) regulated the phosphorylation of PLB at Thr17 in adult cardiomyocytes. N = 3. Data in **(a-c)** are mean  $\pm$  s.e.m. \*P<0.05 versus Vehicle group. The data were analyzed by using One-way ANOVA followed by Turkey post-test in **(a-c)**.

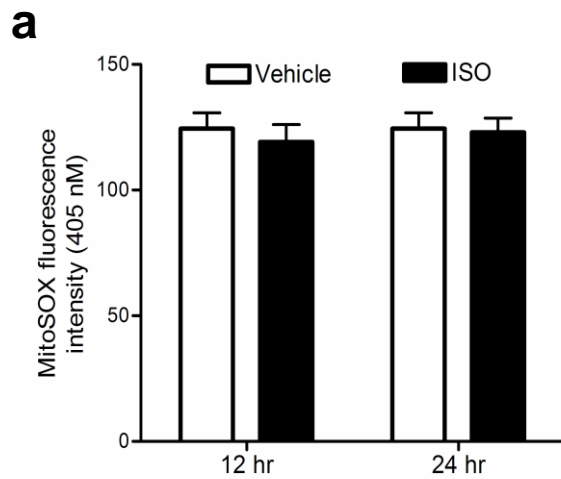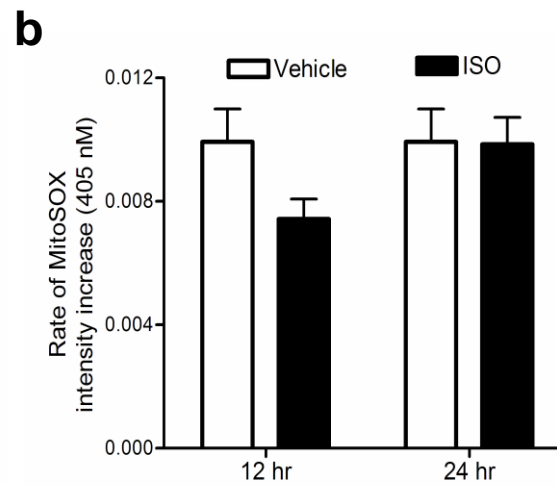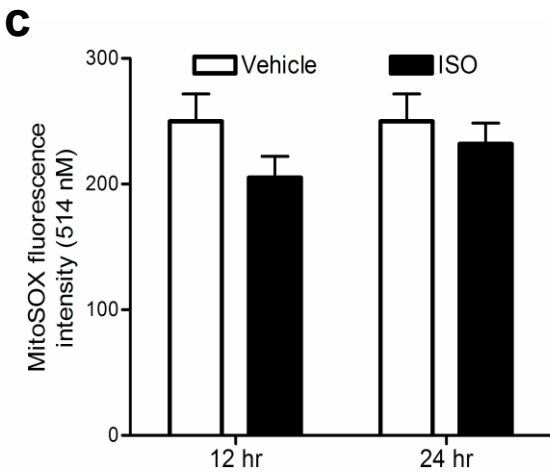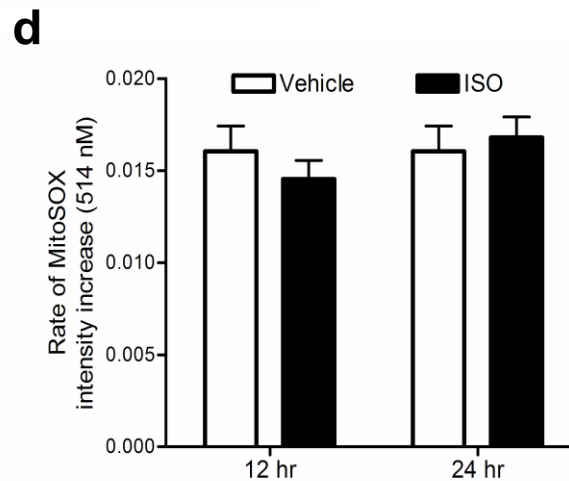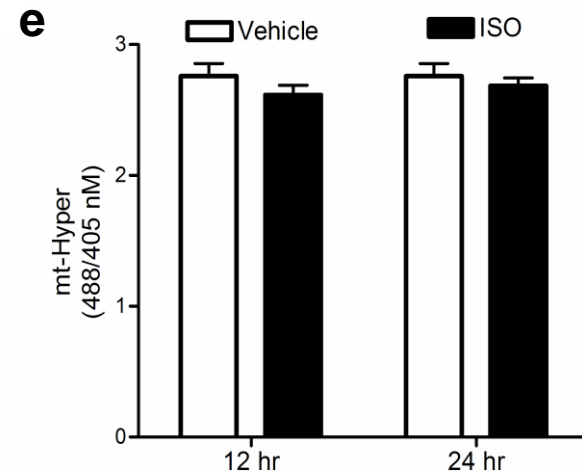

**Figure S5**

**Supplementary Figure 5.** Monitoring of mitochondrial ROS with MitoSOX red (**a-d**) or mitochondrial targeted H<sub>2</sub>O<sub>2</sub> indicator (mtHyper) (**e**) during ISO (100 nM) stimulation. Data are mean  $\pm$  s.e.m. In (**a-d**), N = 46, 38, 46, and 39 cells, and in (**e**), N = 26, 31, 26, and 41 cells from 3-4 rats in the groups of Vehicle 12 hr, 12 hr ISO, Vehicle 24 hr, and 24 hr ISO, respectively. The data were analyzed by using Student's t-test in (**a-e**). No significant differences.

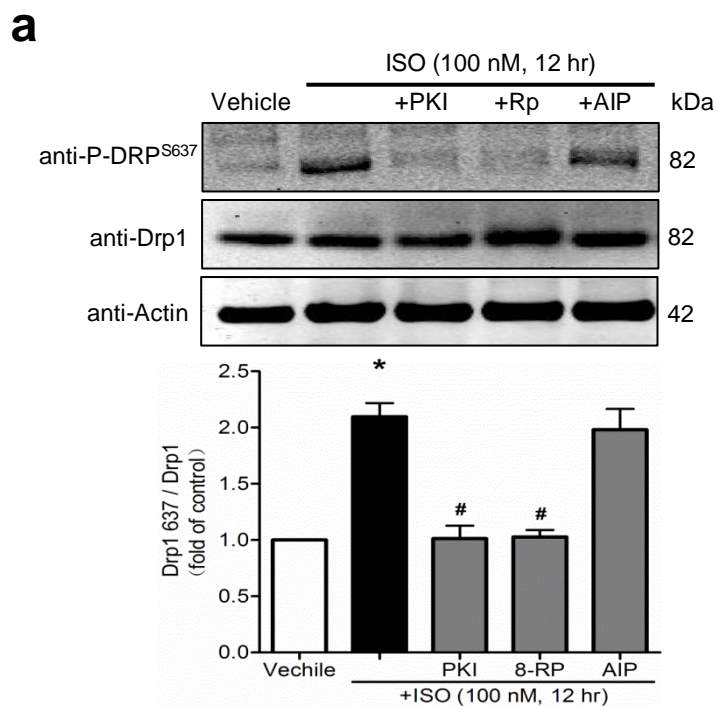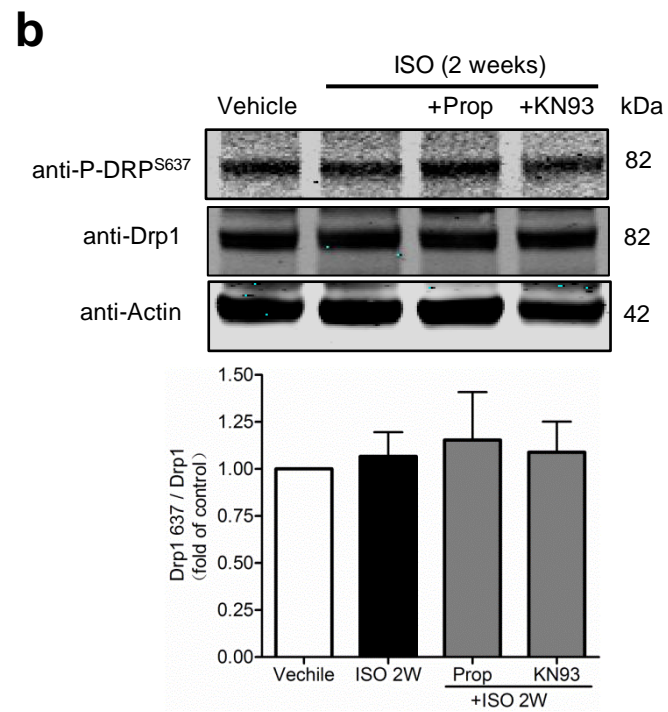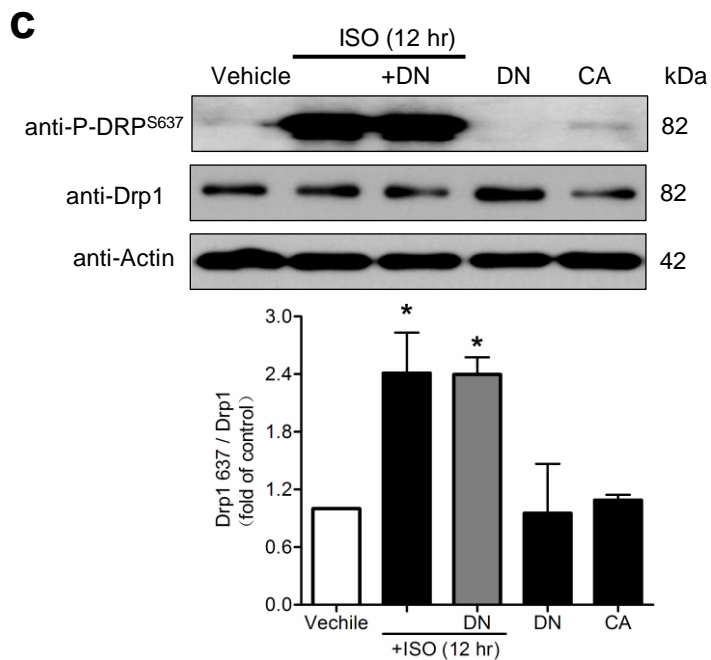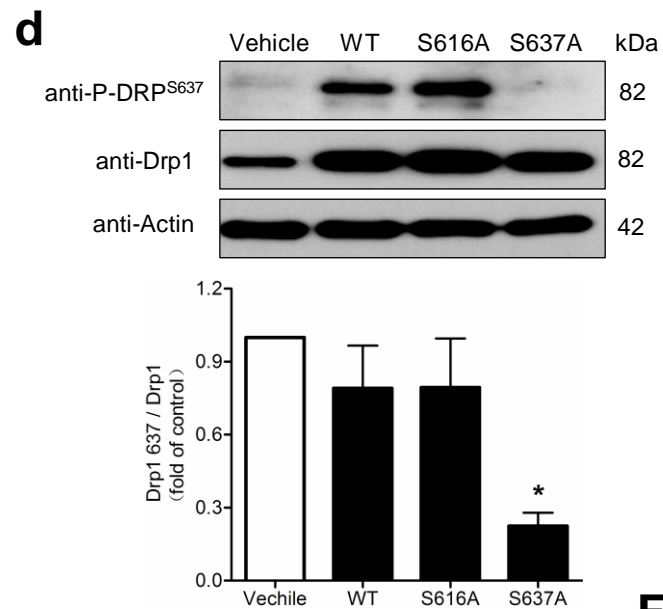

**Figure S6**

**Supplementary Figure 6.** The phosphorylation of Drp1 at serine 637 was not involved in CaMKII-induced cardiotoxicity during the chronic ISO stimulation. **(a)** PKA blockers (PKI and 8-RP-cAMPs), not CaMKII blocker (AIP), attenuated the phosphorylation of Drp1 serine 637 in ISO-treated cardiomyocytes. N = 3. \*P<0.05 versus Vehicle group, #P<0.05 versus ISO group. **(b)** Chronic ISO (15 mg/kg/day, 2 weeks) treatment did not induce phosphorylation of Drp1 at serine 637 site in the hypertrophic heart. N = 4. **(c)** Overexpression of CaMKII CA or CaMKII DN did not change the phosphorylation of Drp1 at serine 637. CaMKII DN also had no effect on ISO-induced Drp1 phosphorylation at serine 637 in adult cardiomyocytes. **(d)** Overexpression wild type Drp1 (WT) or S616A mutation similarly increased Drp1 phosphorylation at S637 likely due to increased total Drp1 levels. The overexpression of S637A mutation cannot be phosphorylated at this site and led to unchanged S637 phosphorylation levels in adult cardiomyocytes. Image in **(c)** and **(d)** are representative of 3 independent experiments. Data are mean  $\pm$  s.e.m. \*P<0.05 versus Vehicle group. The data were analyzed by using One-way ANOVA followed by Turkey post-test in **(a-d)**.

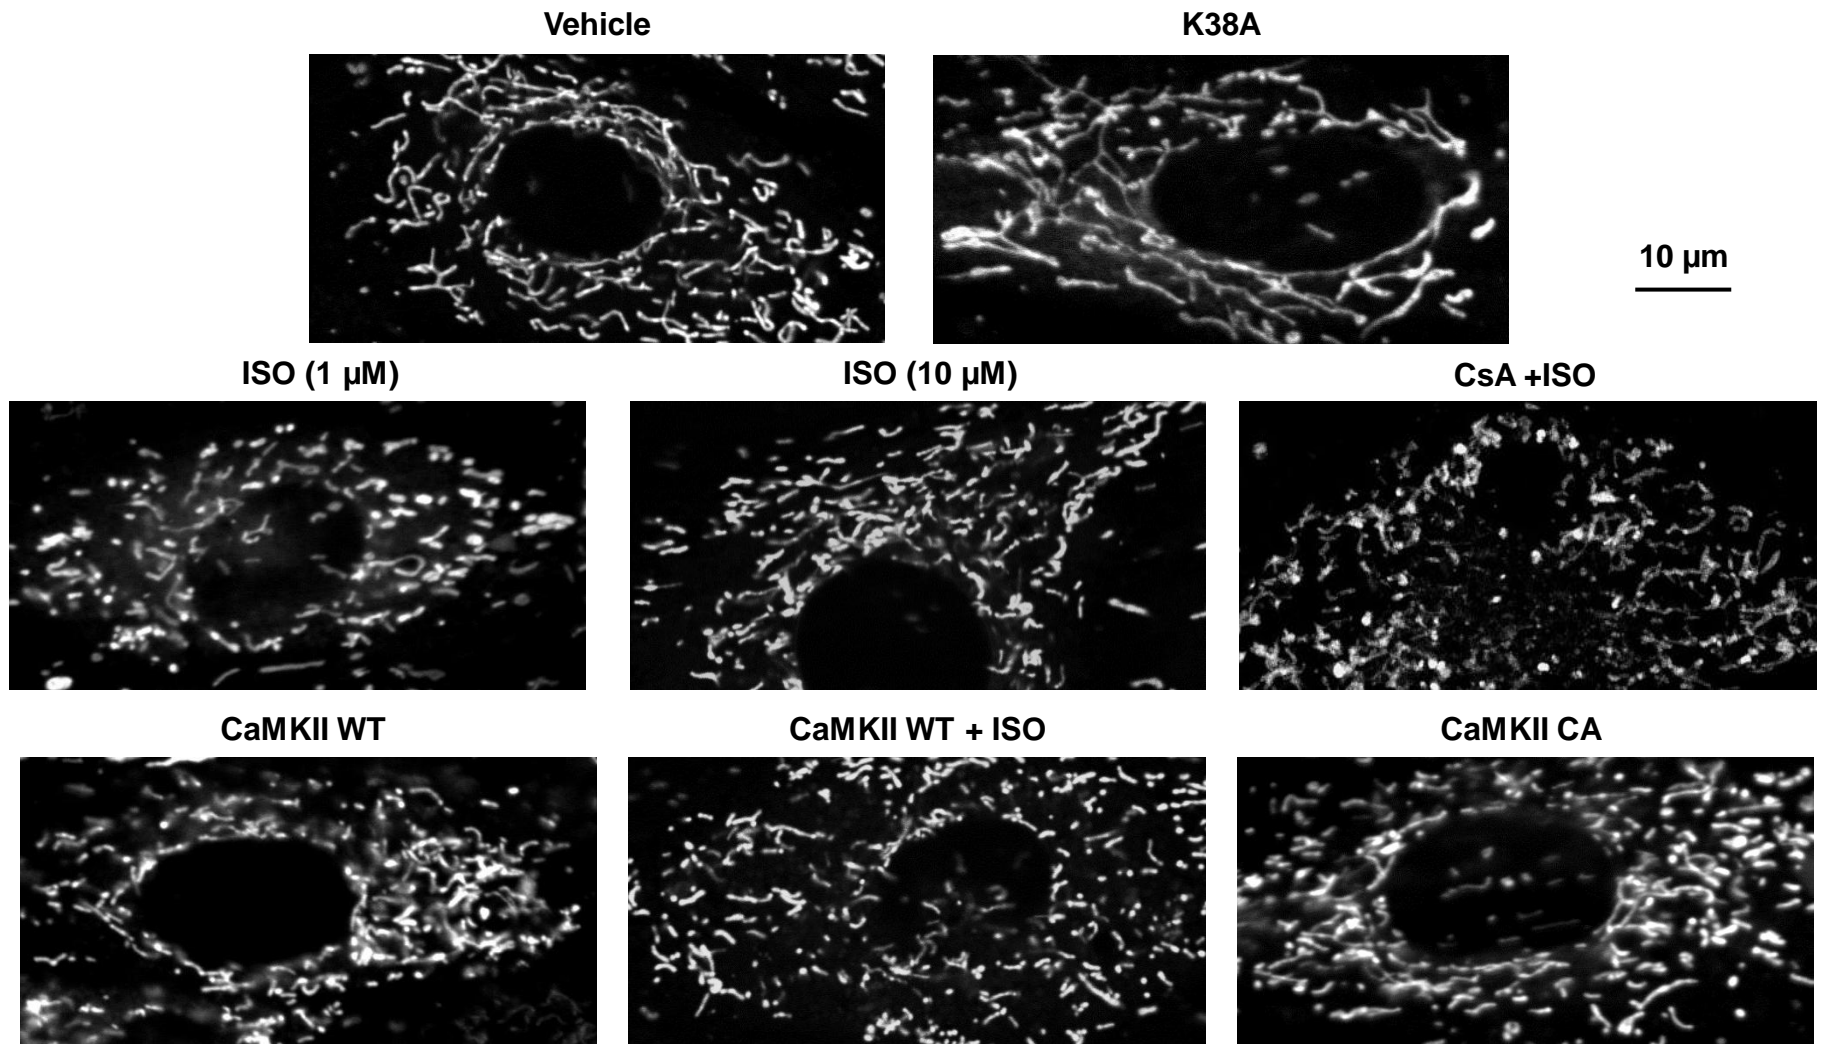

**Supplementary Figure 7.** Representative images showing the changes of mitochondrial morphology in H9C2 cells induced by various treatments. The mitochondrial morphology was monitored in live cells loaded with MitoTracker Green.

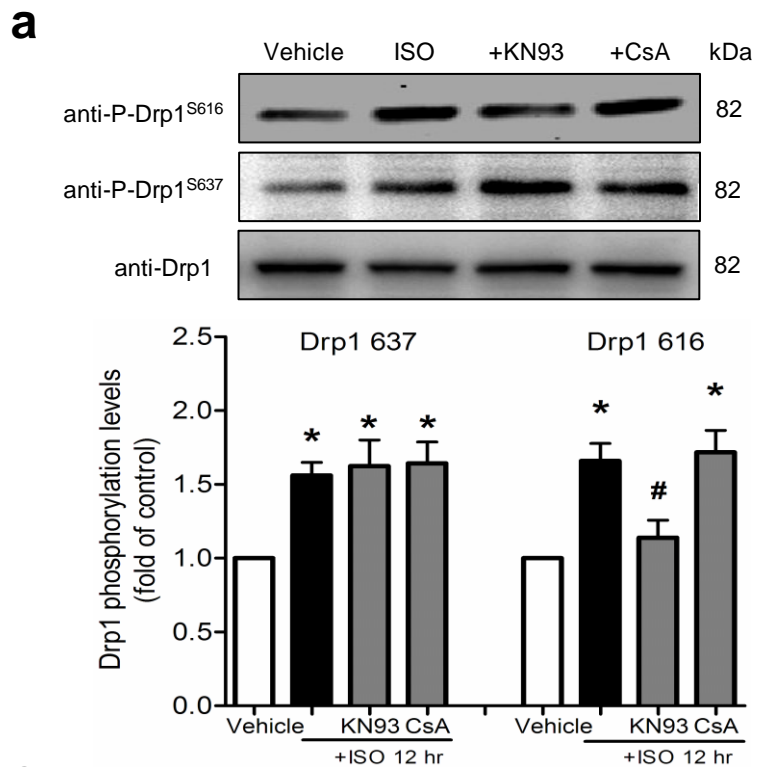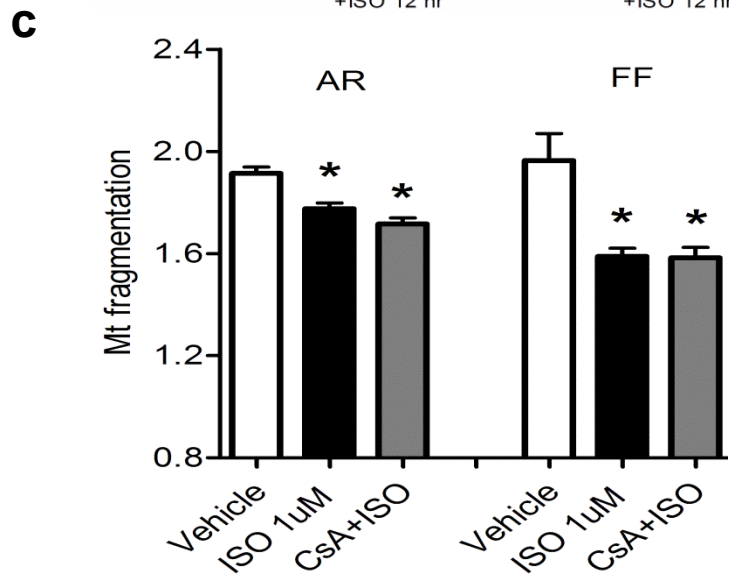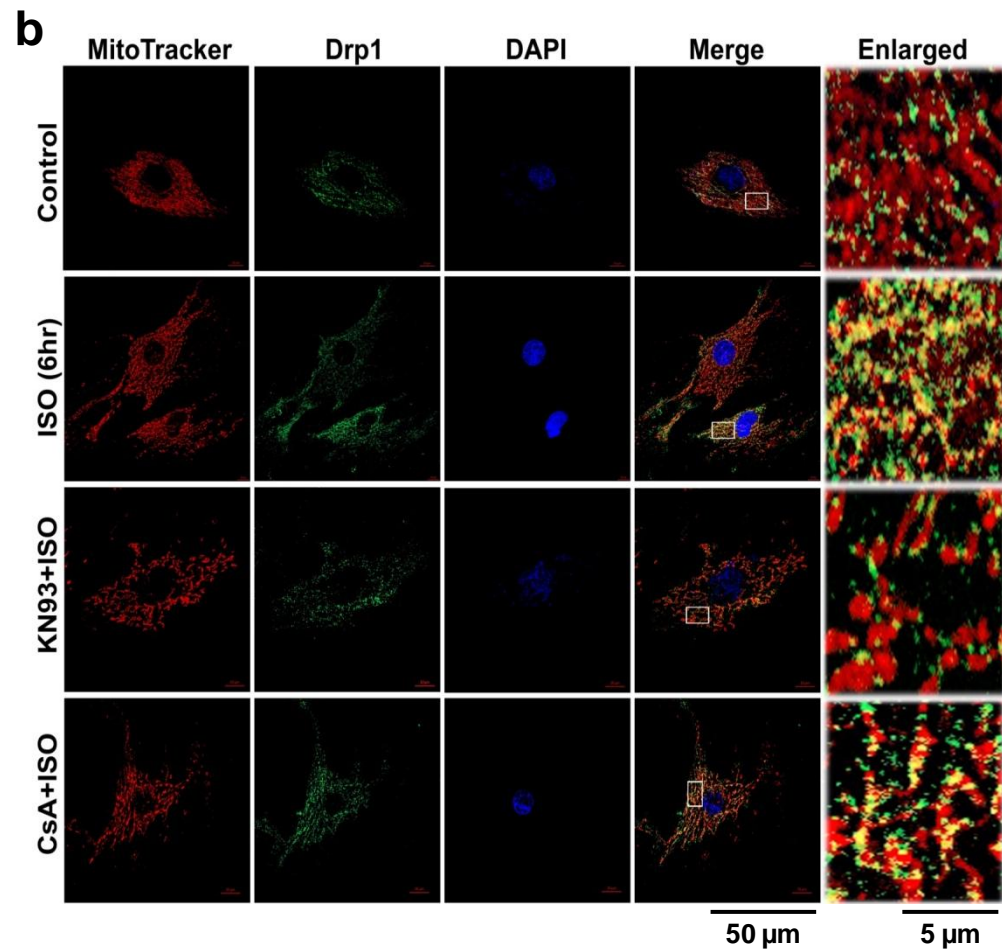

Figure S8



**Supplementary Figure 8.** CsA administration had no effects on ISO-induced Drp1 mitochondrial translocation and fragmentation in H9C2 cells. **(a)** CsA (1  $\mu$ M) pretreatment had no effect on ISO (100 nM, 12 hr)-induced Drp1 phosphorylation at serine 616 and 637 sites in H9C2 cells. N = 3. **(b)** Representative immunofluorescent images showing CsA (1  $\mu$ M) did not block ISO-induced Drp1 translocation to mitochondria in H9C2 cells. N = 3. **(c)** CsA (1  $\mu$ M) also had no effect on ISO-induced mitochondrial fragmentation in H9C2 cells. N = 2246, 2695, and 1864 mitochondria in the groups of Vehicle, ISO and CsA+ISO, respectively. \*P<0.05 versus Vehicle group, #P<0.05 versus ISO group. Data are mean  $\pm$  s.e.m. The data were analyzed by using One-way ANOVA followed by Turkey post-test in **(a and c)**.

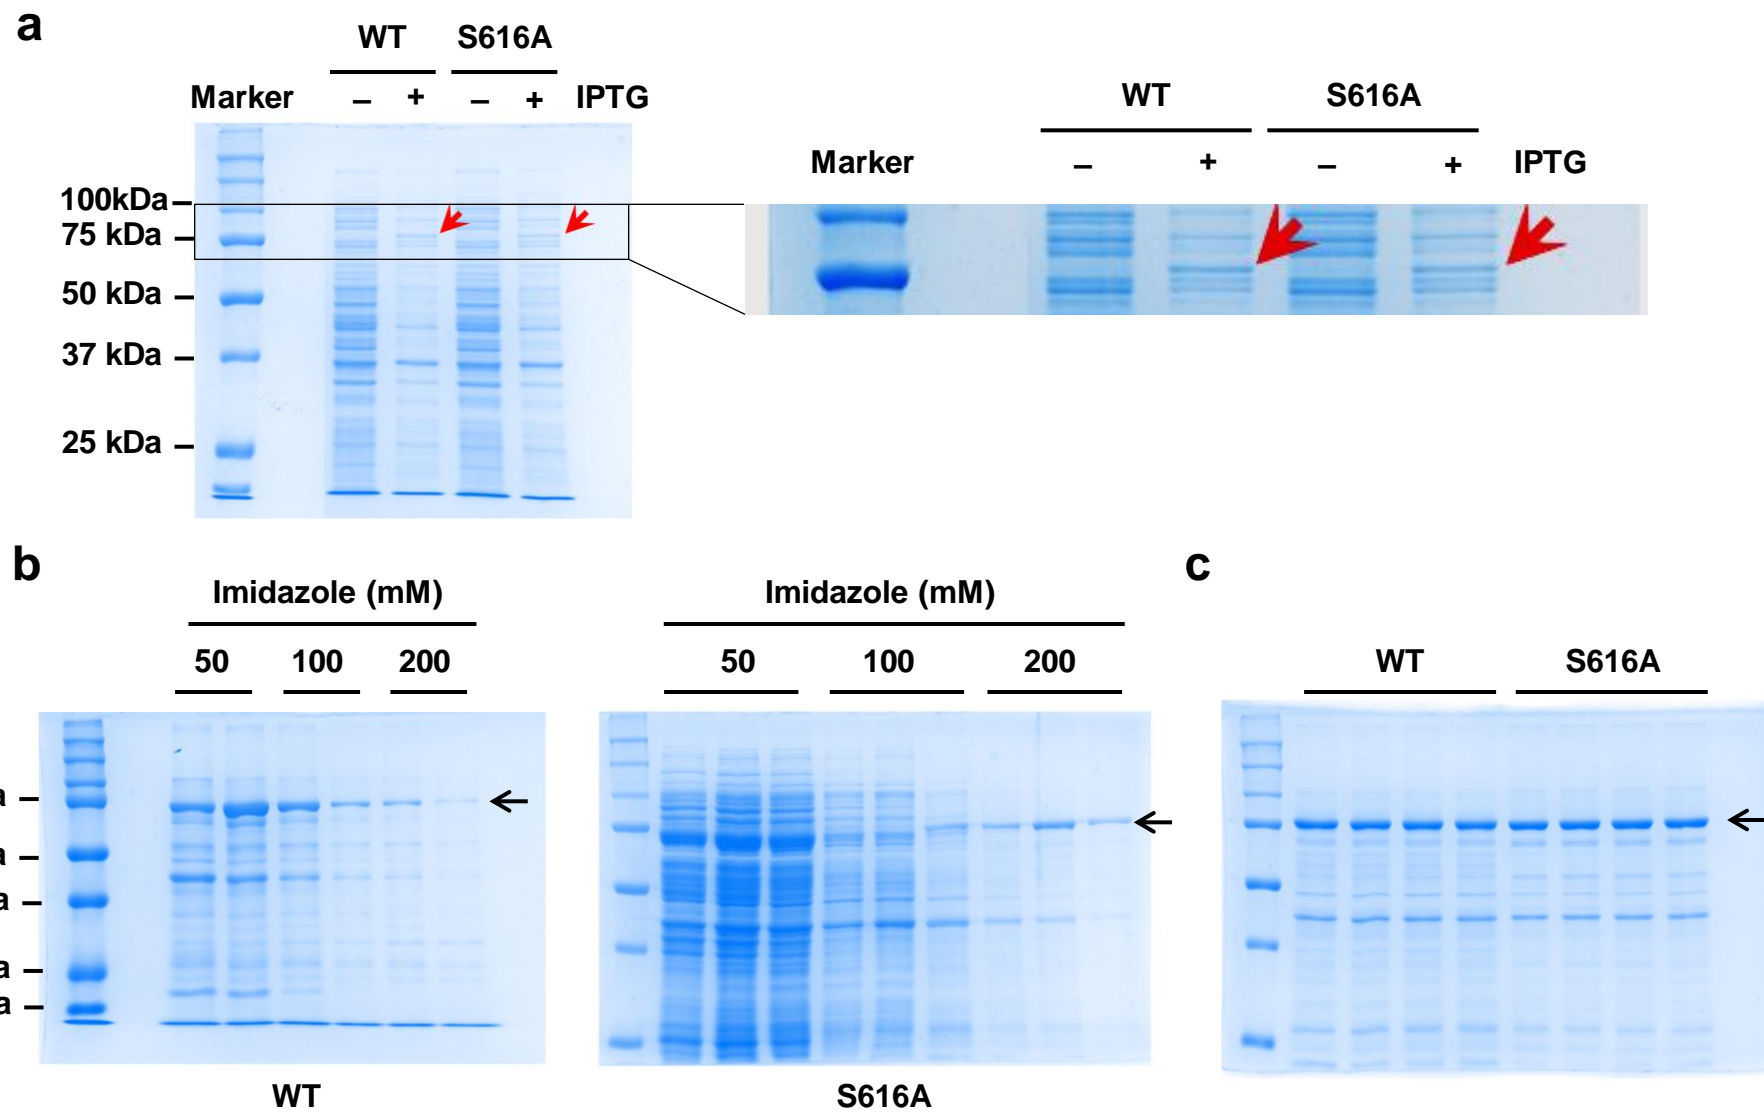

**Figure S9**

**Supplementary Figure 9.** Prokaryotic expression and purification of mouse wild type Drp1 and S616A mutation. **(a)** Crude cell lysates showing the induction of protein expression by IPTG. **(b)** Purification of wild type Drp1 and Drp1 S616A mutation. Imidazole was added after the crude lysates were incubated with Nickle resin to elute the proteins. The fraction after 200 mM imidazole were combined and used for *in vitro* phosphorylation assay. **(c)** Coomassie blue staining of the gel with the same loading of samples shown in Fig. 7b. Arrows indicate the corresponding Drp1 bands. Note, in the mouse sequence the mutation was done at S579 site, which is equivalent to S616 in human Drp1. For consistency and clarity we labeled the mutation according to human Drp1 sequence.

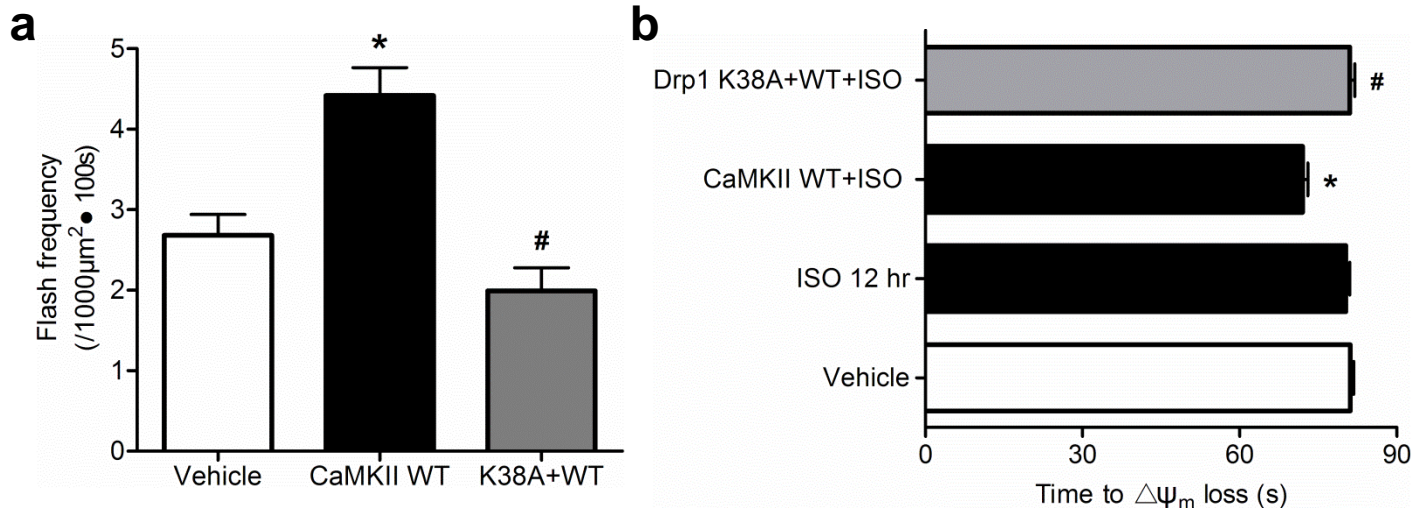

**Supplementary Figure 10.** Drp1 K38A prevented mPTP openings and mitochondrial stress induced by overexpression of CaMKII WT in adult cardiomyocytes. **(a)** Drp1 K38A blocked the increased flash frequency by overexpressing CaMKII WT. N = 14, 15, and 16 cells in the groups of Vehicle, CaMKII WT and K38A+WT, respectively. **(b)** Drp1 K38A prolonged the time of laser-induced loss of  $\Delta\psi_m$  in adult cardiomyocytes overexpressing CaMKII WT. N = 192-535 mitochondria from 15-48 cells. N = 535, 366, and 192 mitochondria from 15-48 cells in the groups of Vehicle, CaMKII WT and K38A+WT, respectively. Data in **(a, b)** are mean  $\pm$  s.e.m. \*P<0.05 versus Vehicle group, #P<0.05 versus CaMKII group. The data were analyzed by using One-way ANOVA followed by Turkey post-test in **(a-b)**.

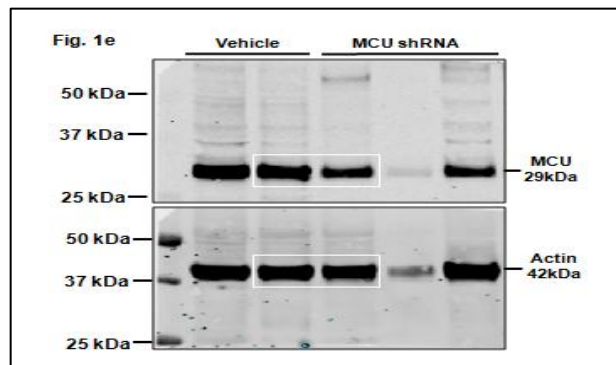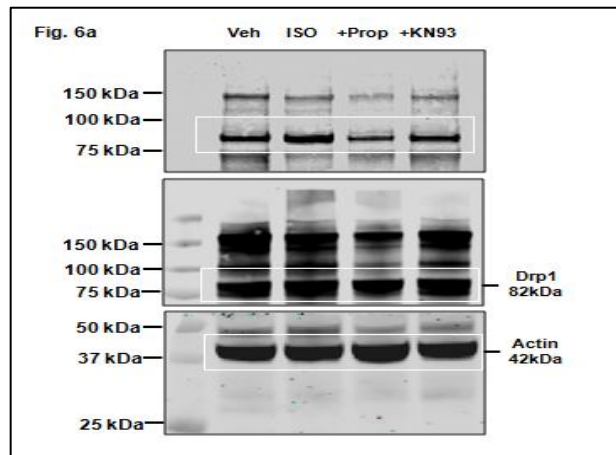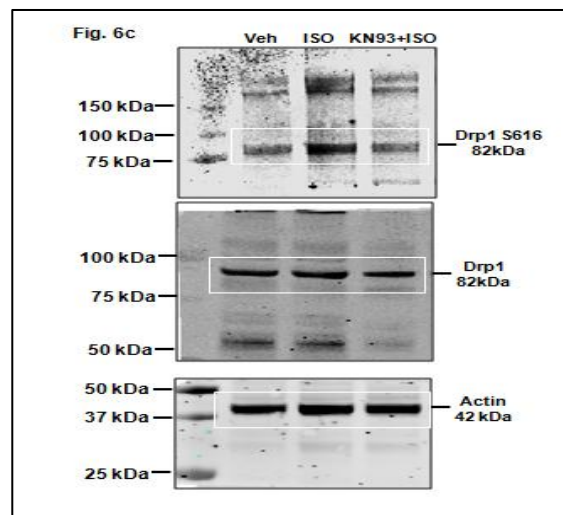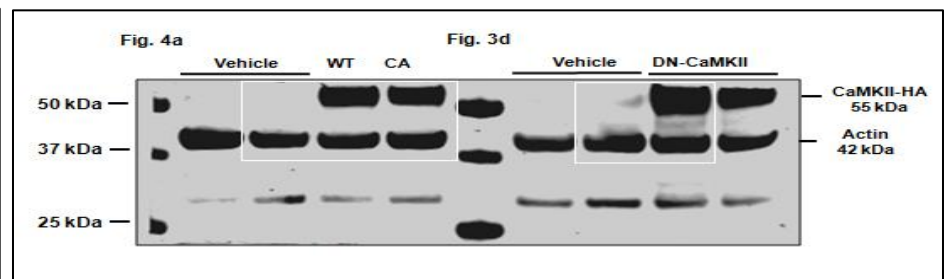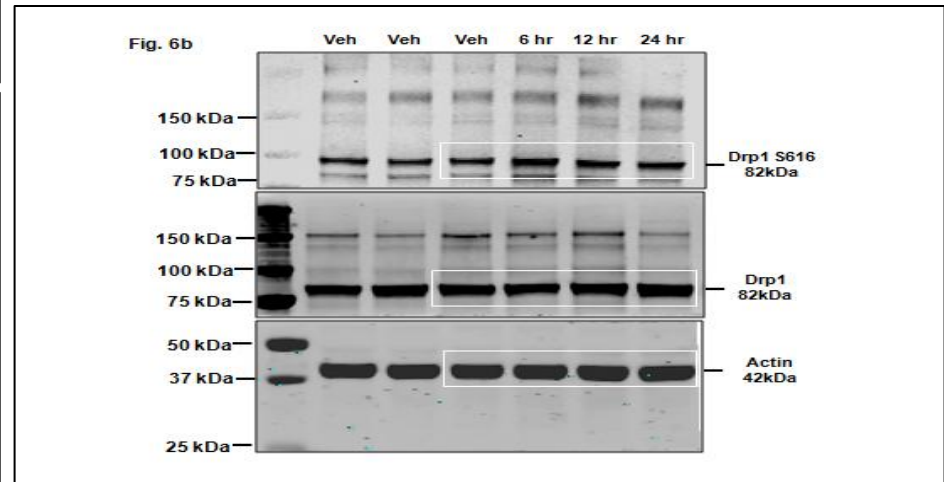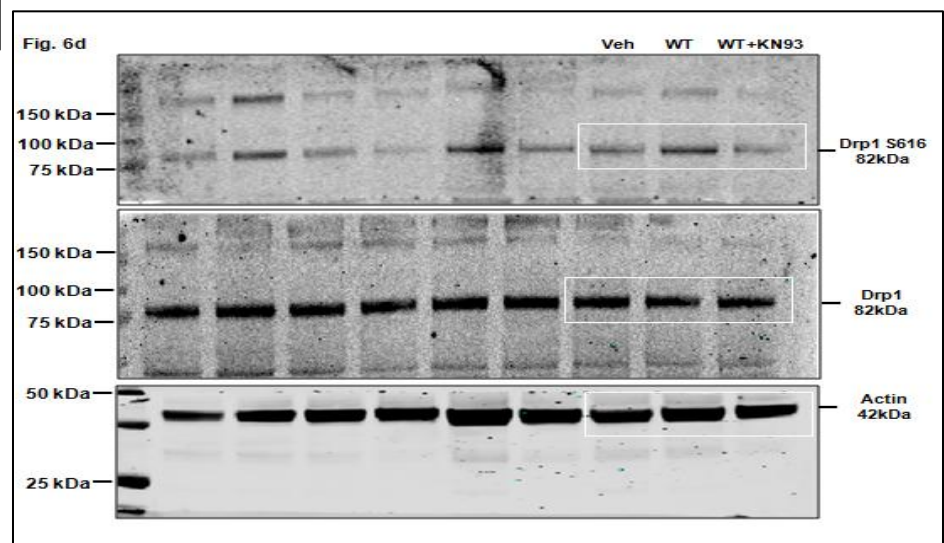

**Figure S11**

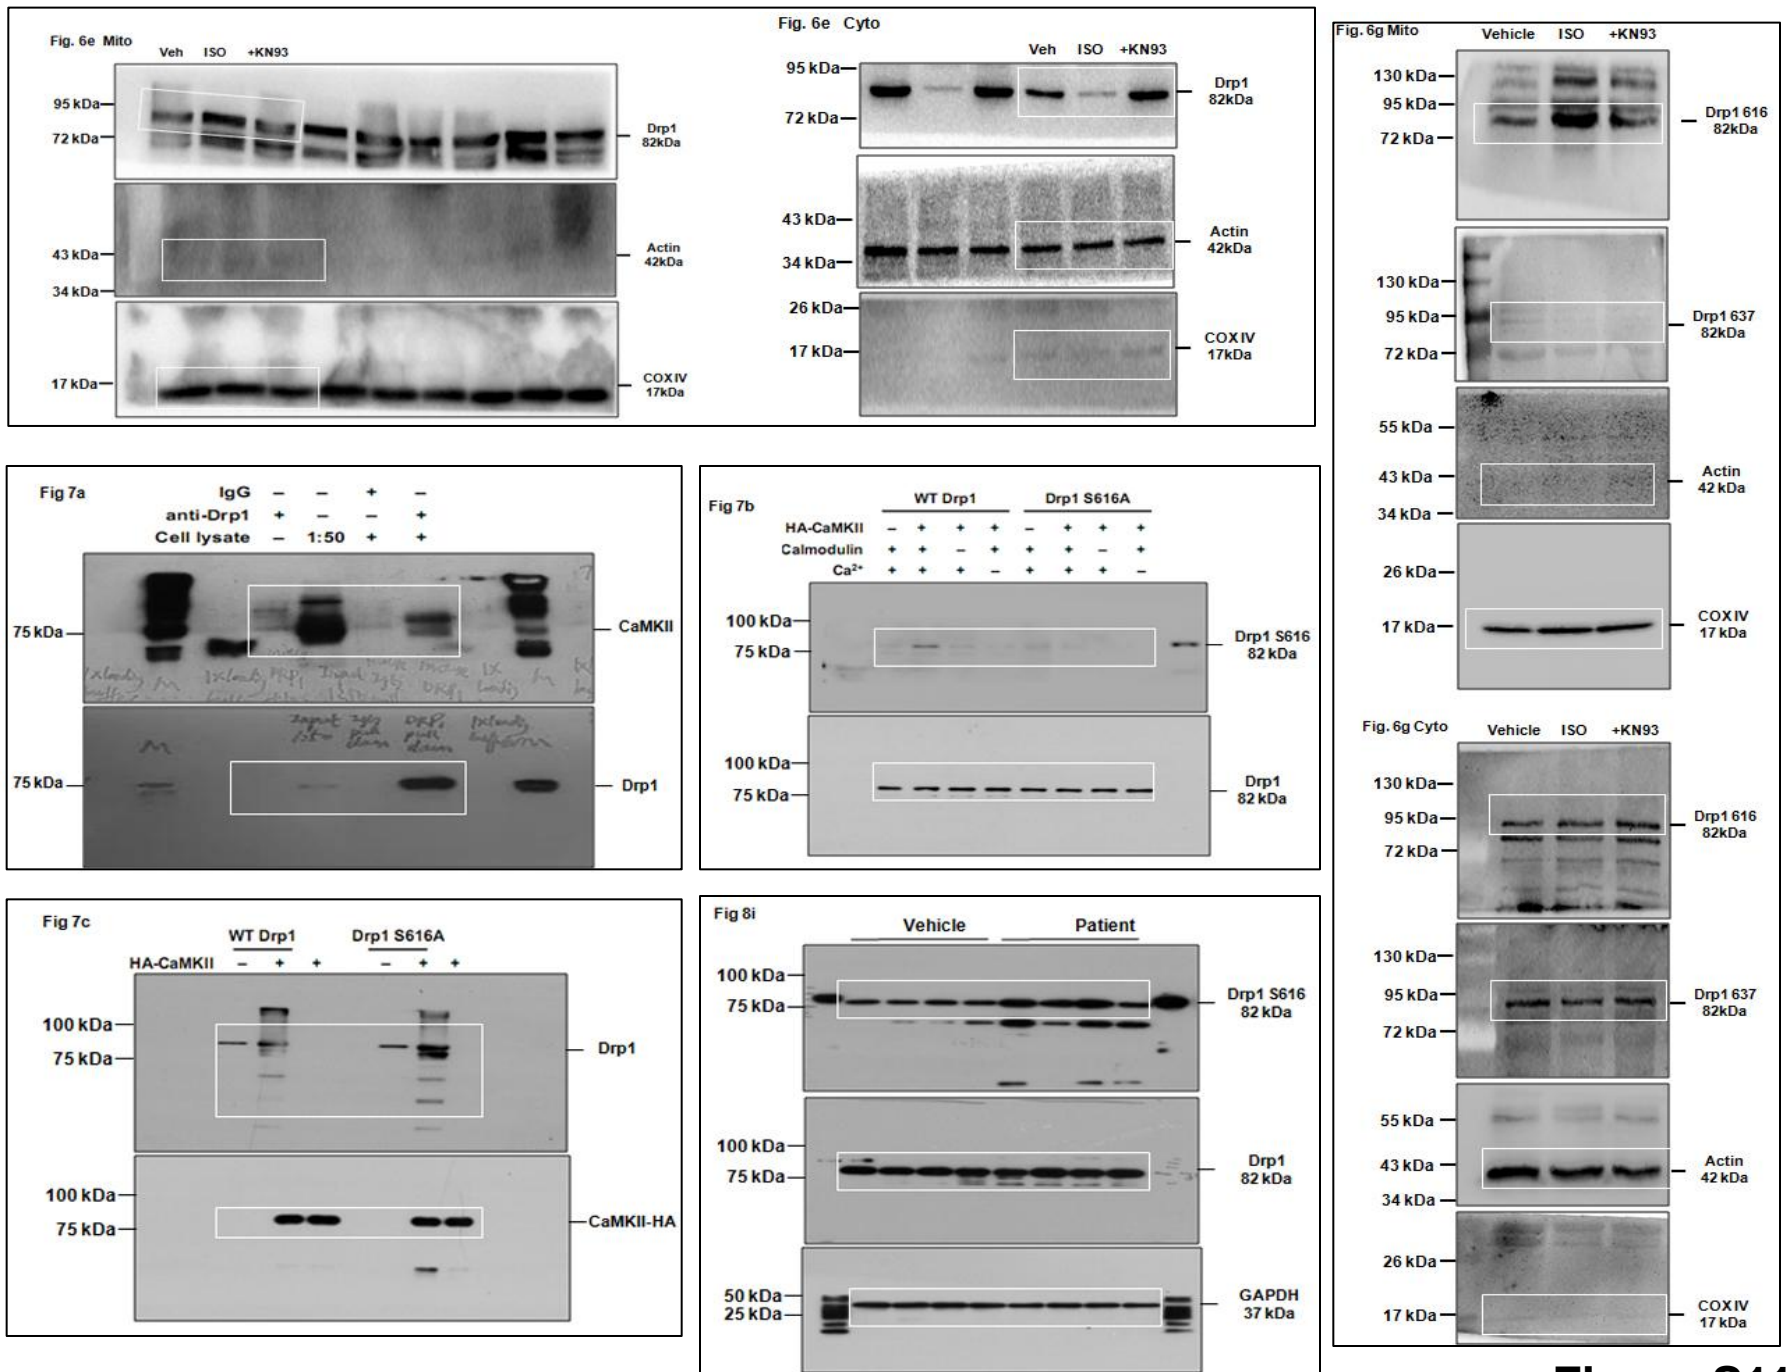

**Figure S11**

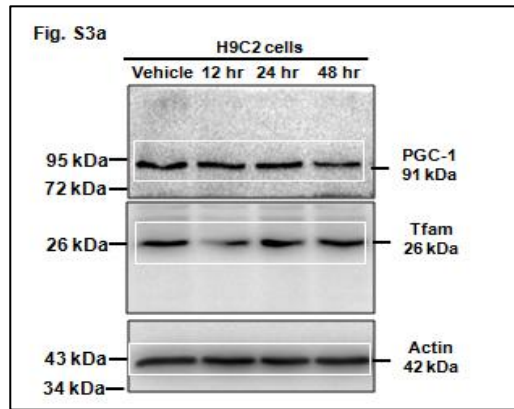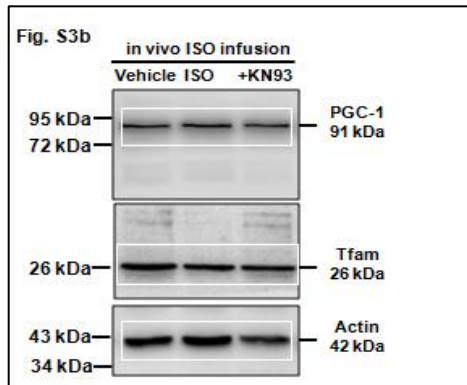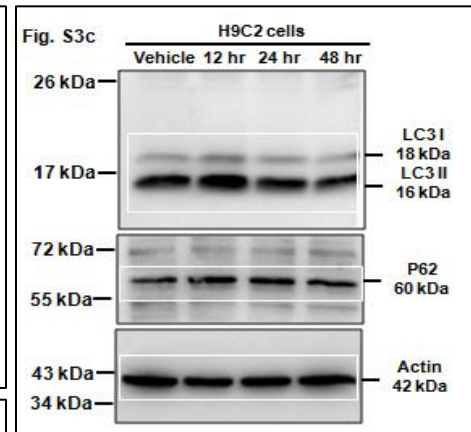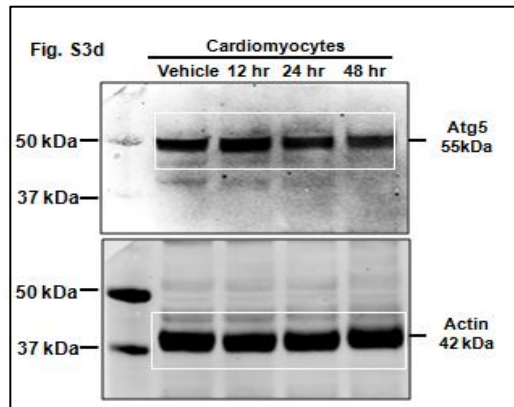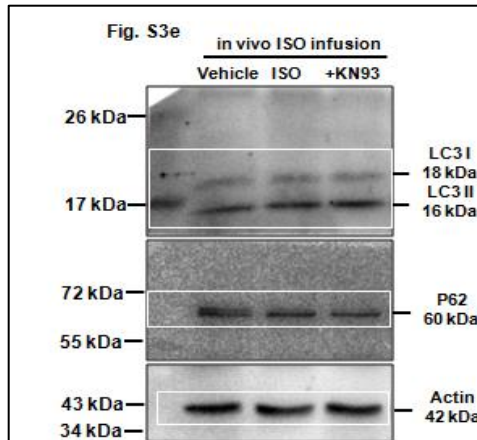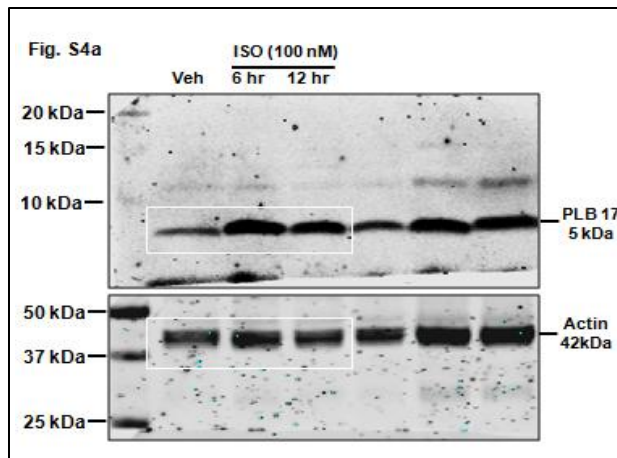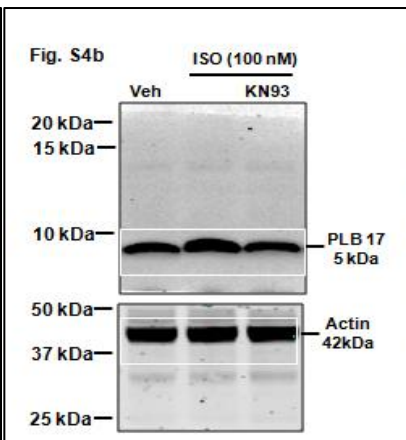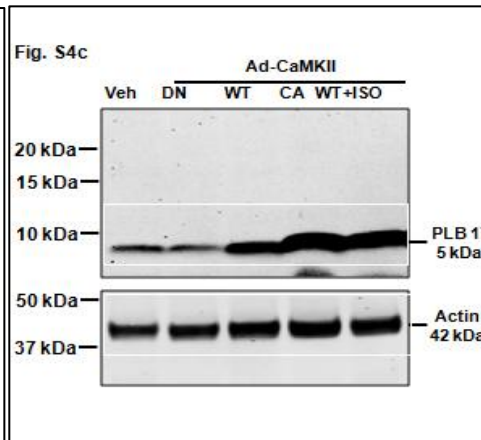

**Figure S11**

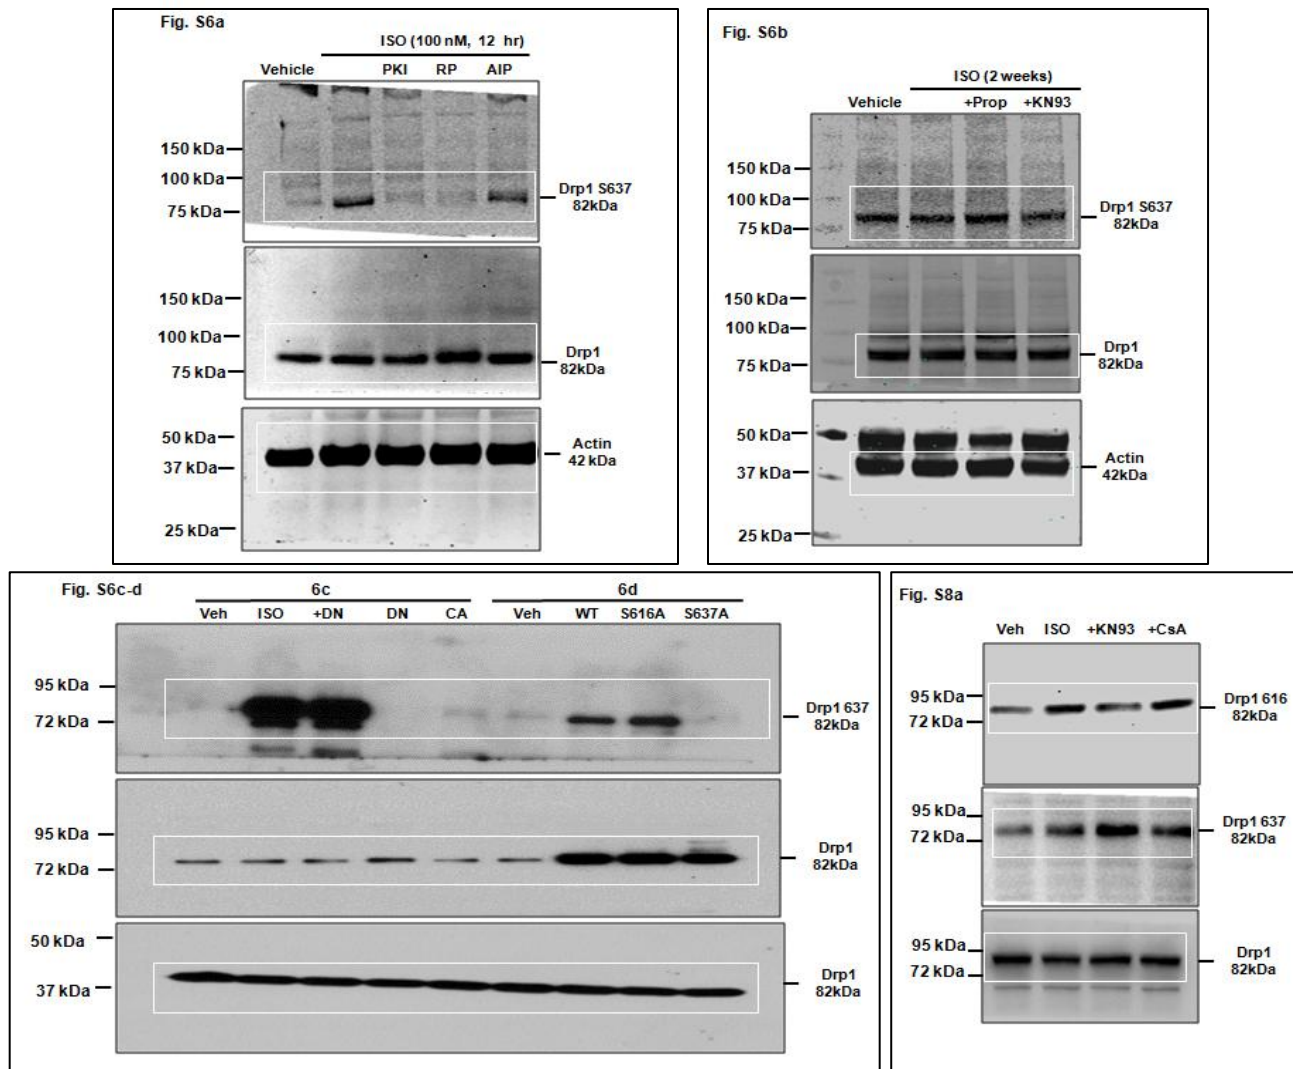

**Supplementary Figure 11.** Original un-cropped images of all the Western blots shown in the Figures and Supplementary Figures. The white boxes indicate the area/bands selected for the figures. We used protein ladders (Bio-Rad #161-0373 or Thermo Scientific #26617) to identify the molecular weight of the protein of interest.
